# Supplementary material
Source: PubMed Central journal article supplement (PMC2860913)
Supplement: JCI40266sd.pdf [file JCI40266sd.pdf]

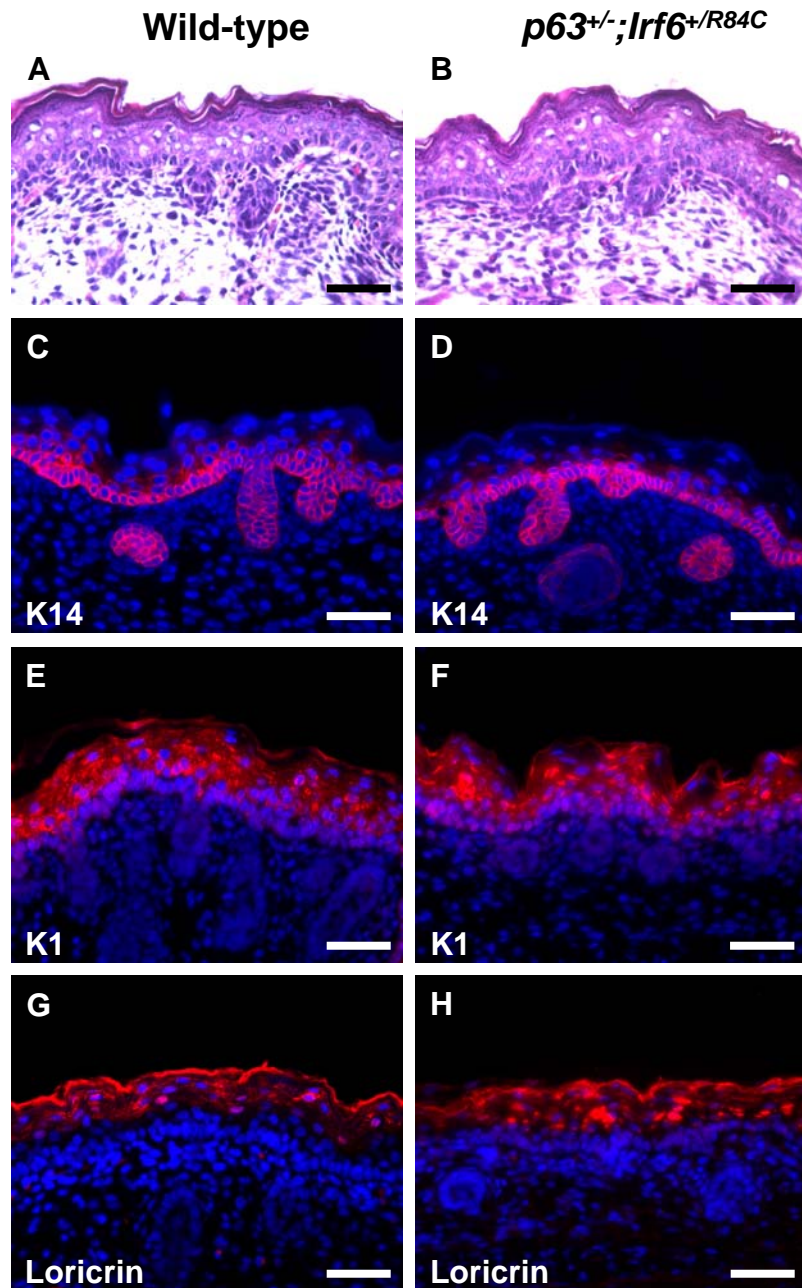

**Supplementary Figure 1. Analysis of E18 wild-type and  $p63^{+/-};Irf6^{+/R84C}$  epidermis.** (A and B) Histological analyses indicate that the epidermis of  $p63^{+/-};Irf6^{+/R84C}$  mice is indistinguishable from that of their wild-type littermates. (C to H) Immunofluorescence assays confirm that the epidermis of wild-type and  $p63^{+/-};Irf6^{+/R84C}$  mice undergoes an identical differentiation program as judged by expression of keratin 14, keratin 1 and loricrin. Scale bars: 50  $\mu\text{m}$ .

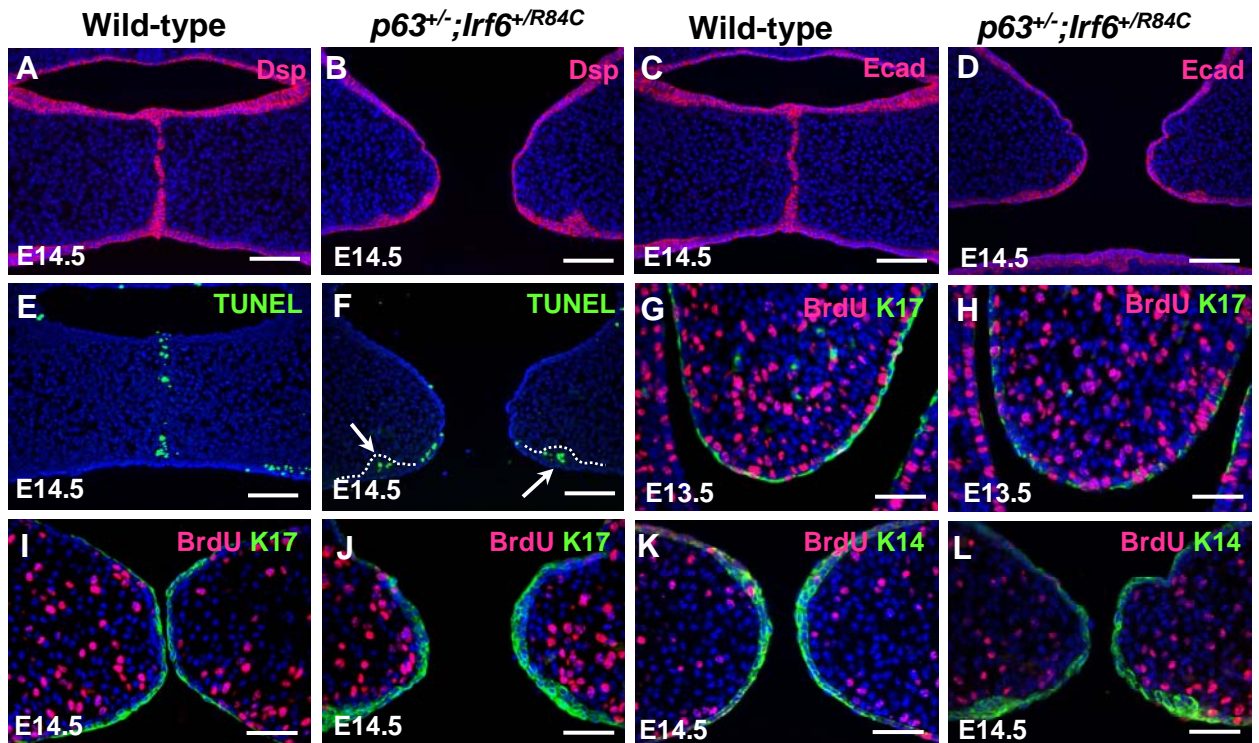

**Supplementary Figure 2. Analysis of the MEE of the palatal shelves of wild-type and  $p63^{+/-};Irf6^{+/R84C}$  embryos.** (A to D) Immunofluorescence analyses of E14.5 mice indicate that the expression patterns of desmoplakin (A and B) and E-cadherin (C and D) are the same in wild-type and  $p63^{+/-};Irf6^{+/R84C}$  embryos. (E and F) TUNEL assays indicate that cell death was present in the seam and epithelial triangles of wild-type embryos; in contrast, as the palates have not fused in the  $p63^{+/-};Irf6^{+/R84C}$  embryos, cell death was only detected in small islands on the oral surface of the palate (arrowed in F). (G to L) BrdU analyses, in conjunction with keratin 17 (G to J) and keratin 14 (K and L) immunostaining, indicate that neither the abnormal periderm cells nor the basal cells are hyper-proliferative in  $p63^{+/-};Irf6^{+/R84C}$  embryos. Scale bars: A to F, 100  $\mu\text{m}$ ; G to L, 50  $\mu\text{m}$ .



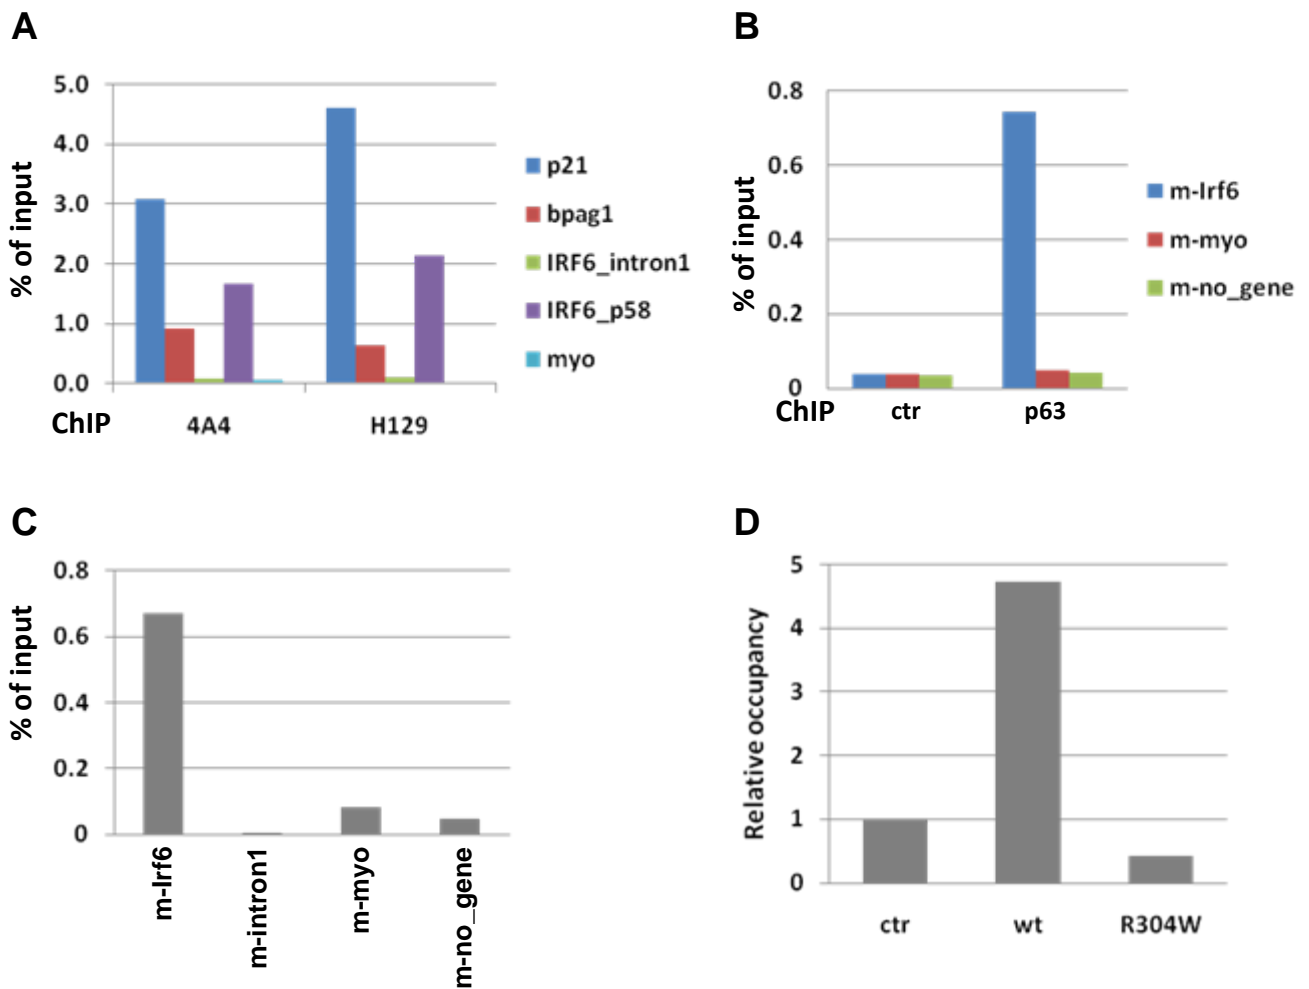

**Supplementary Figure 4. ChIP-qPCR analysis of p63 binding sites near the *IRF6* gene in human primary keratinocytes, mouse palatal shelves and in SAOS-2 stable cell lines expressing p63.** (A) ChIP-qPCR analysis of p63 binding was performed in human primary keratinocytes using two different p63 antibodies [4A4 (pan-p63) and H129 ( $\alpha$ -specific)]. Specific binding of p63 to the reported binding sites upstream of the *IRF6* gene (IRF6-p58), but not to the putative site in the first intron region (IRF6\_intron1) was observed. Promoter regions of p21 and BPAG were used as positive controls and that of myoglobin exon 2 (myo) as the negative controls. (B, C) Mouse palatal shelves were dissected from E13.5 embryos and used for ChIP-qPCR analysis using antibody 4A4. IgG was used for control ChIP (ctr in B). In mouse palatal shelves, p63 binds specifically to the upstream enhancer region of *Irf6* (homologous to p229 region in human) but not to intron 1 and negative control genes (myo and no gene). (D) ChIP-qPCR analyses performed with antibody 4A4 in SAOS-2-inducible cell lines expressing  $\Delta$ Np63 $\alpha$  wild-type (wt) and mutant R304W proteins show abolition of p63 binding as a result of the R304W mutation.

**Supplementary Table 1. Cloning primers for peak 229 region in the p63 binding site**

| <b>Primers</b>       | <b>Sequences</b>                                    |
|----------------------|-----------------------------------------------------|
| IRF6_cloning_p229_FW | ggggacaagttgtacaataaaagcaggcttcTGTGTGACCATCTGCCTGTC |
| IRF6_cloning_p229_RV | ggggaccactttgtacaagaaagctgggtgGCTTAAGGGGGAAACCTTTG  |
| IRF6_SDM_p229_M1_FW  | CTGTGCTGTGGAAAATGCCAGATTATCCTCTCTTCCCC              |
| IRF6_SDM_p229_M1_RV  | GGGGAAGAGAGGATAATCTGGCATTTCACAGCACAG                |
| IRF6_SDM_p229_M2_FW  | GCATTCTAGTTAAGACCCAGAACCATCCTGGCAGCC                |
| IRF6_SDM_p229_M2_RV  | GGCTGCCAGGATGGTTCTGGGTCTTAAGTAAATGC                 |

**Supplementary Table 2. Primers for RT-qPCR analysis**

| <b>Primers</b> | <b>Sequences</b>         |
|----------------|--------------------------|
| IRF6_exp1_FW   | TAGAGAAGCAGCCACCGTTT     |
| IRF6_exp1_RV   | GCCACTACTGGAATGACCTGA    |
| IRF6_exp2_FW   | TTCTGGTGGACAGATTGAGC     |
| IRF6_exp2_RV   | AGGGCCATGATATGGAAGAG     |
| IRF6_exp3_FW   | CAAGTGTGTGACATCCCTCAG    |
| IRF6_exp3_RV   | CCACATCATTATCCTTCTCATCC  |
| hARP_exp_FW    | CACCATTGAAATCCTGAGTGATGT |
| hARP_exp_RV    | TGACAAGCCCAAAGGAGAAG     |
| mIrf6 F        | AGGGCTCTGTCATTAATCGAG    |
| mIrf6 R        | TGATTCGGGGCTGCAGTTTC     |

**Supplementary Table 3. Primers for ChIP analysis**

| <b>Primers</b>    | <b>Sequences</b>           |
|-------------------|----------------------------|
| IRF6_ChIP_p229_FW | ACCGGCAGCATTCTTAGTTC       |
| IRF6_ChIP_p229_RV | ACTGGGCTGAGATGAGCTTC       |
| IRF6_ChIP_p58_FW  | TTTCTCACATTCCCACATGC       |
| IRF6_ChIP_p58_RV  | CCAACCTGACAGACTCCTACC      |
| p21_ChIP_FW       | GTGGCTCTGATTGGCTTTCTG      |
| p21_ChIP_RV       | CTGAAAACAGGCAGCCCAAG       |
| BPAG_ChIP_FW      | TCCTGGACATCTGTGAGGCA       |
| BPAG_ChIP_RV      | CCAATTGCAACCACCTAAAAAAC    |
| myo ex2_FW        | AAGTTTGACAAGTTCAAGCACCTG   |
| myo ex2_RV        | TGGCACCATGCTTCTTTAAGTC     |
| chr11_nogene_FW   | TTGCATATAAAGGAAACTGAAATGCT |
| chr11_nogene_RV   | TTACTGCCATGGGTCCGTATC      |
